# Supplementary material
Source: Springer Nature journal article supplement (https://www.springermedizin.de/resource/supplementary/12889_2009_2154_MOESM3_ESM.pdf/9484770)

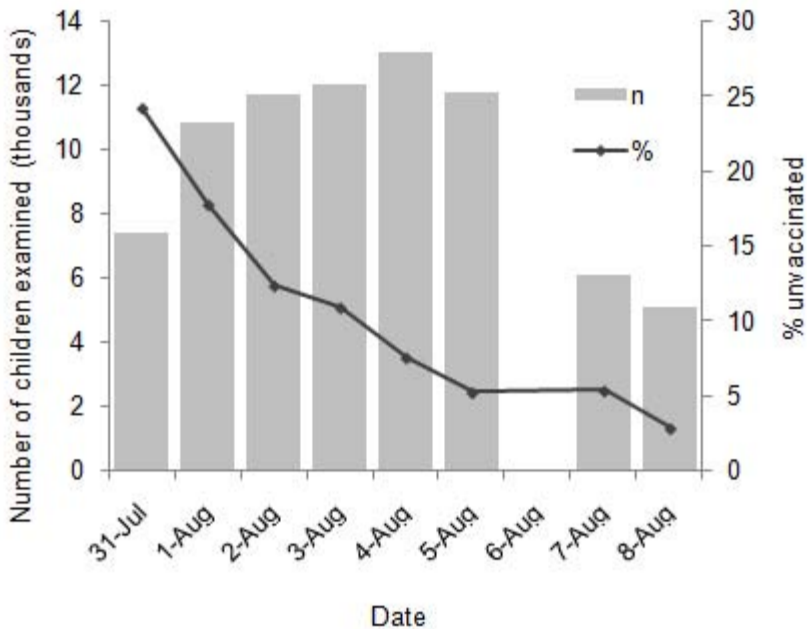

Supplement: MOESM3 [file 9484770]
